# Supplementary material
Source: Royal Society of Chemistry journal article supplement (doi:10.1039/d5ta10525k)
Supplement: d5ta10525k1.pdf [file d5ta10525k1.pdf]

# Mesoporous platinum coating on quartz fibres by soft-templated electroless deposition

Mandy Hei Man Leung,\* Hirokatsu Miyata, Yusuke Asakura, Asep Sugih Nugraha and Yusuke Yamauchi\*

\*E-mail: [leung.hei.man.f2@f.mail.nagoya-u.ac.jp](mailto:leung.hei.man.f2@f.mail.nagoya-u.ac.jp), [y.yamauchi@uq.edu.au](mailto:y.yamauchi@uq.edu.au)

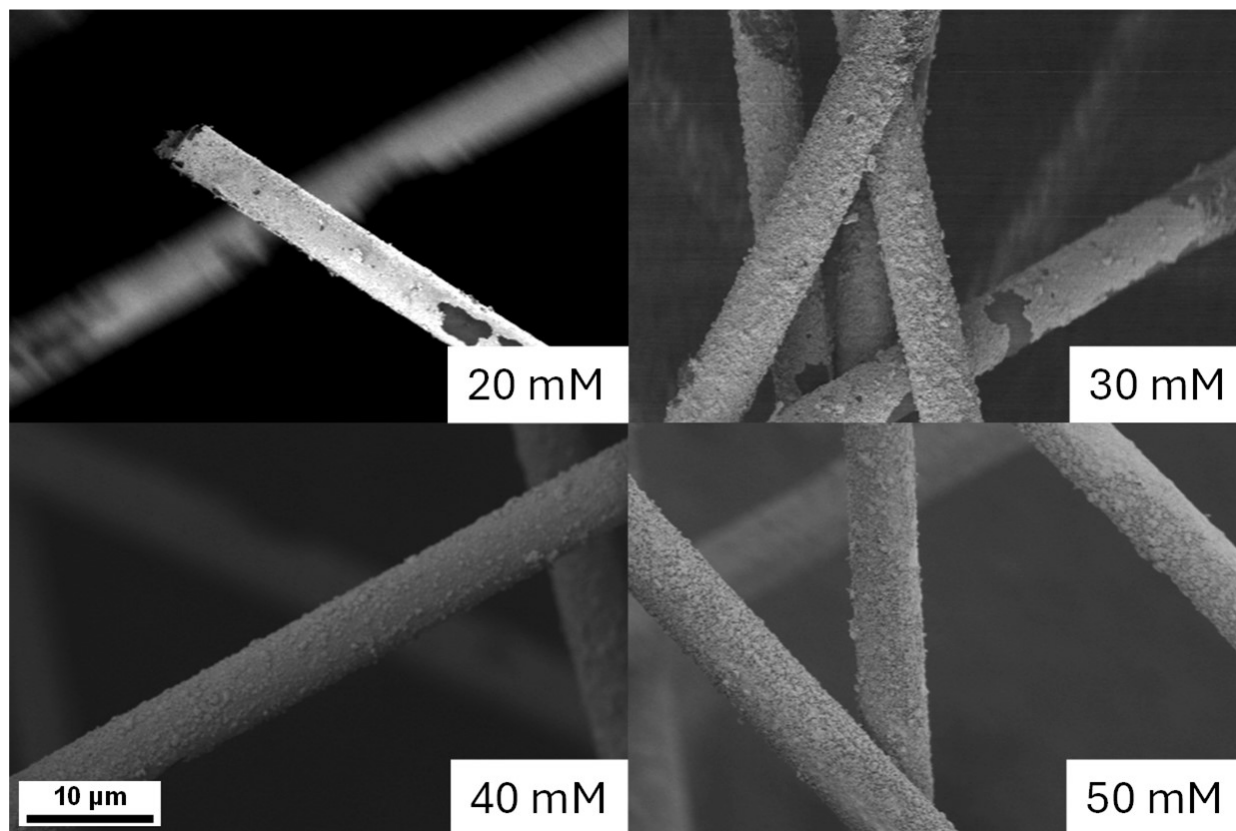

**Fig. S1.** SEM images of mPt@QF taken from the centre of the QF sample synthesized using starting Pt precursor concentrations of 20, 30, 40, and 50 mM.

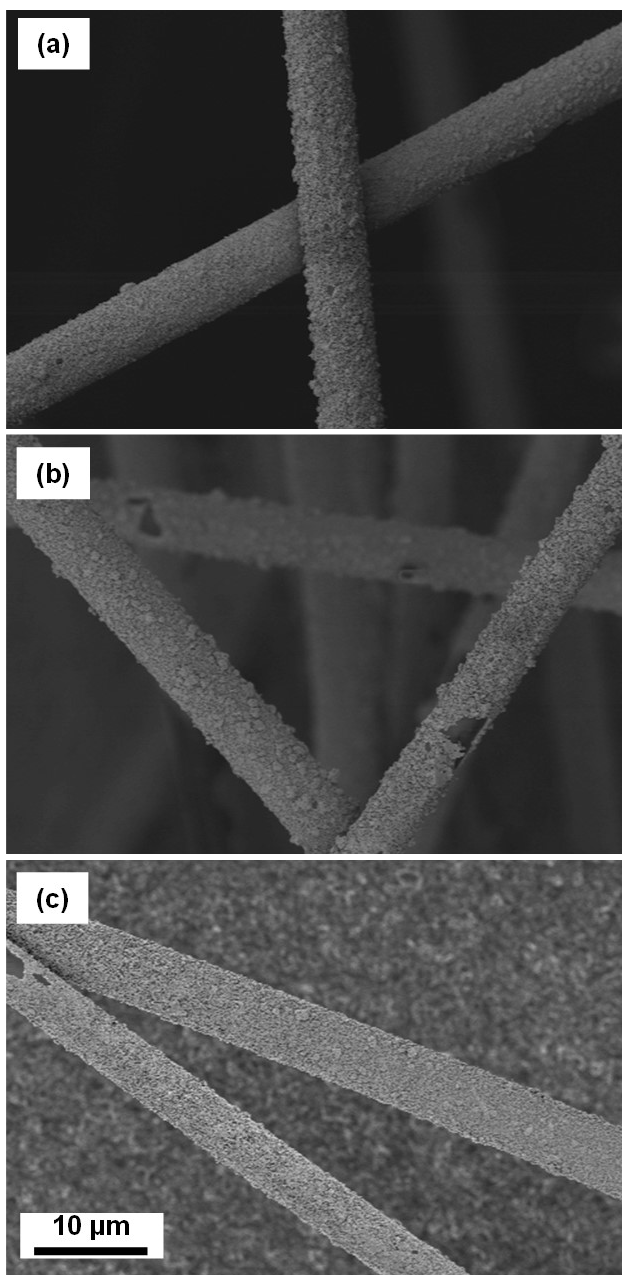

**Fig. S2.** SEM images of mPt@QF collected from two different locations within the same sample (a, b), and from a separate batch (c) under the same condition with Pt precursor concentrations of 40 mM.

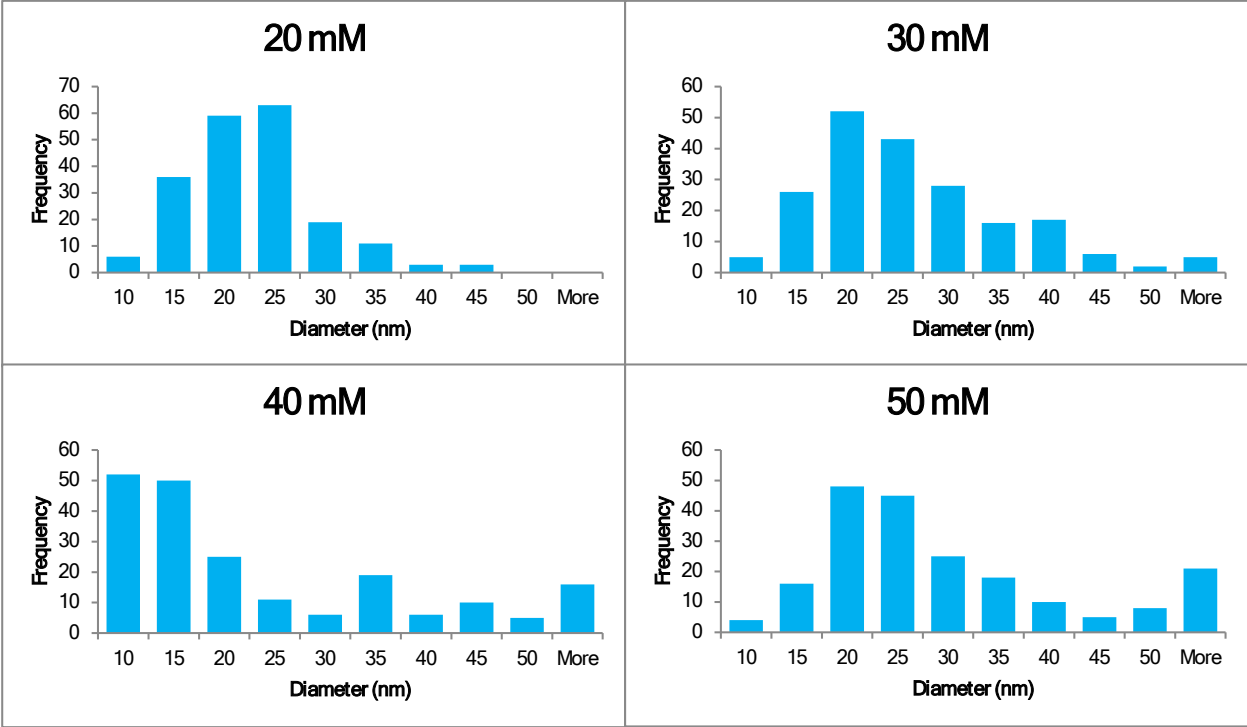

**Fig. S3.** Measured pore size distribution of as-prepared mPt@QF synthesized using starting Pt precursor concentrations of 20, 30, 40, and 50 mM.

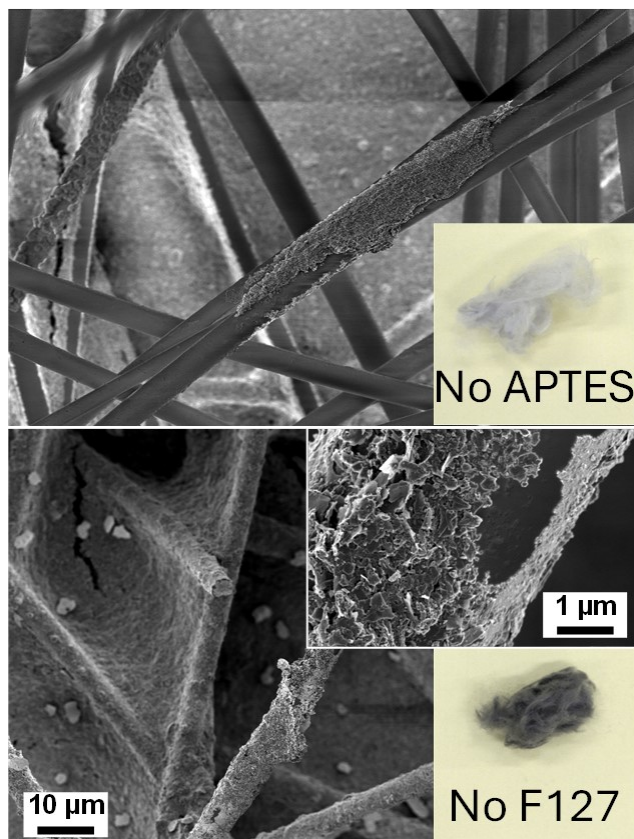

**Fig. S4.** SEM images of mPt@QF synthesized using starting Pt precursor concentrations of 40 mM in the absence of APTES or F127.

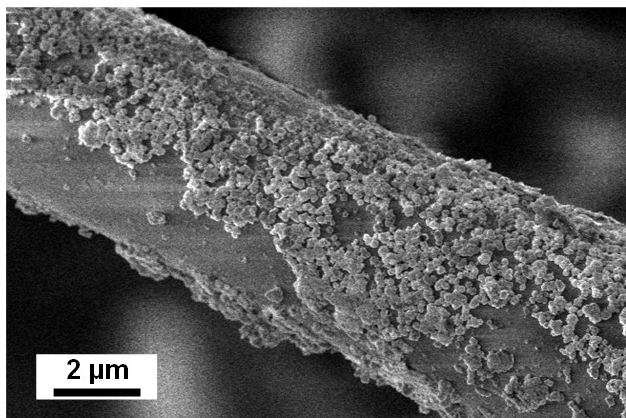

**Fig. S5.** SEM images of mPt@QF synthesized using 100 mg QF at starting Pt precursor concentrations of 20 mM.

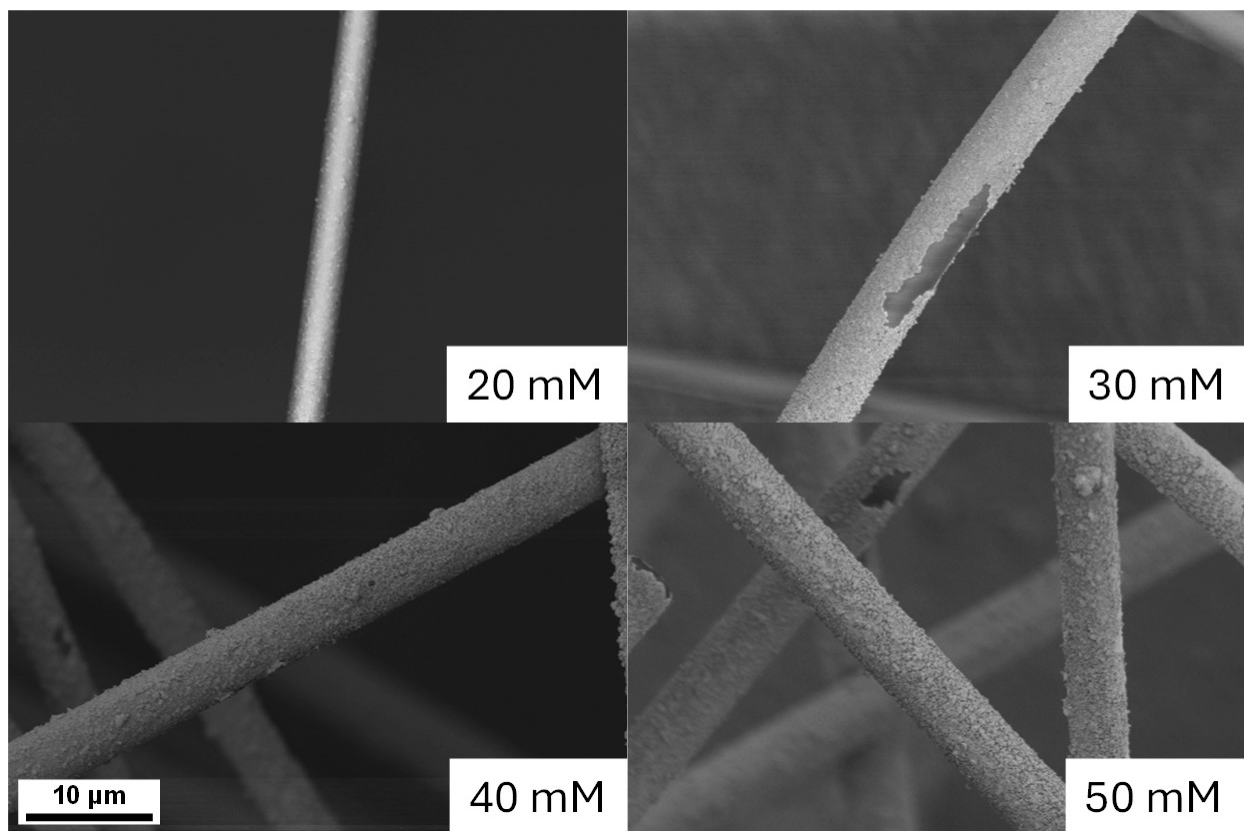

**Fig. S6.** SEM images of mPt@QF synthesized using starting Pt precursor concentrations of 20, 30, 40, and 50 mM after 100 °C treatment.

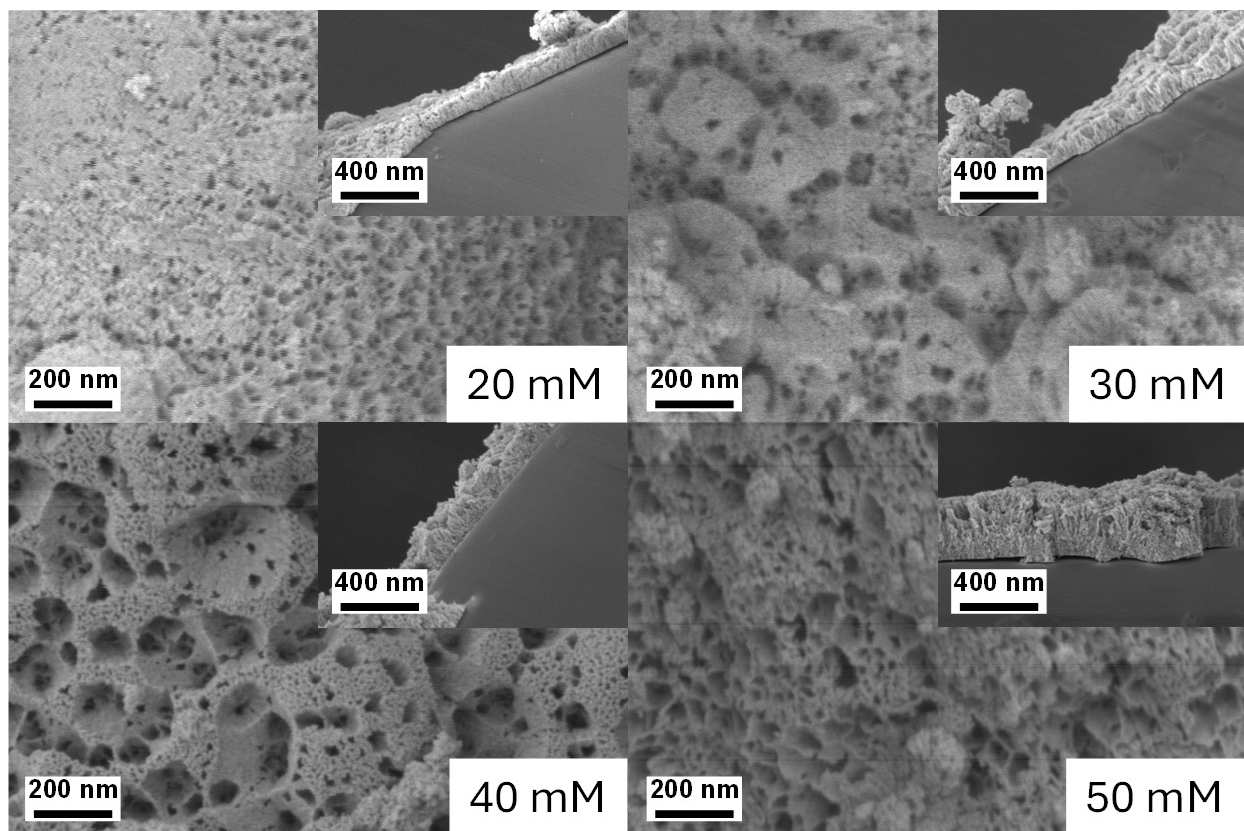

**Fig. S7.** High magnification SEM images of mPt@QF synthesized using starting Pt precursor concentrations of 20, 30, 40, and 50 mM after 100 °C treatment.

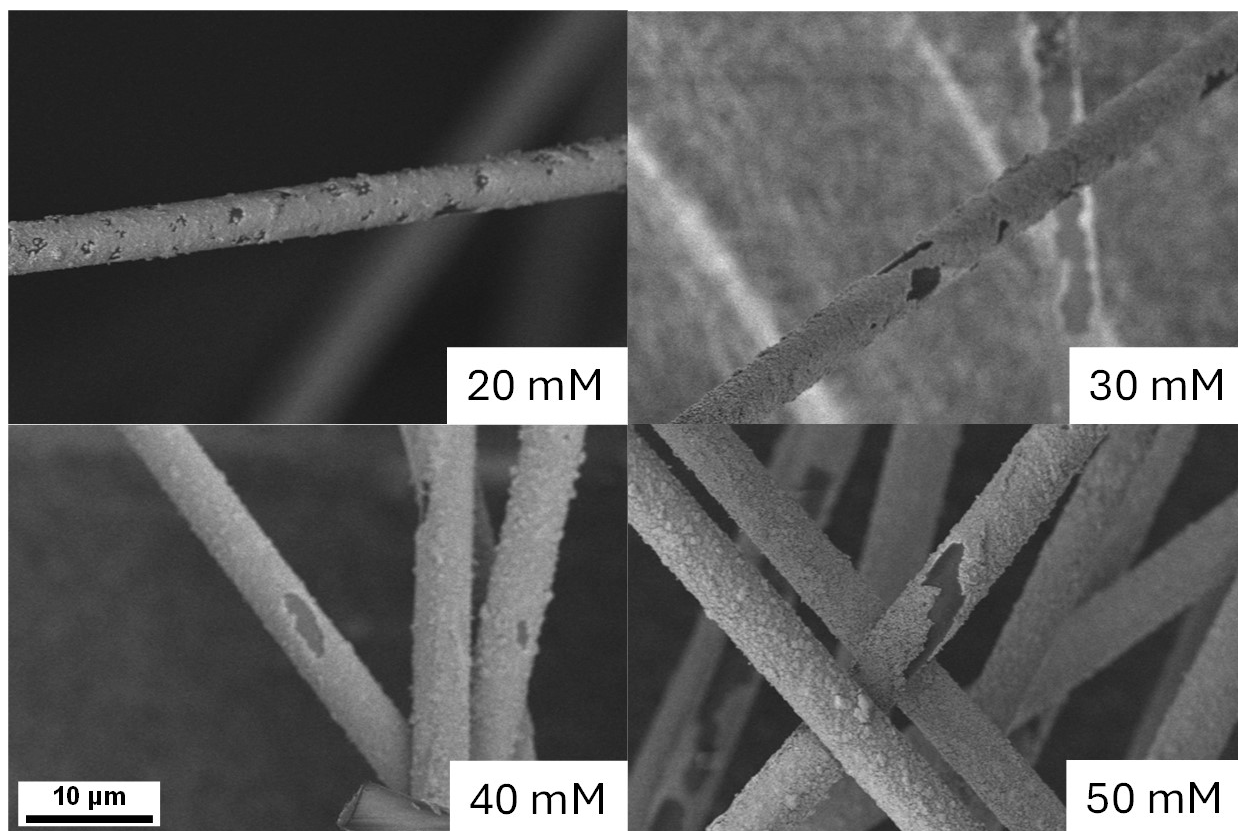

**Fig. S8.** SEM images of mPt@QF synthesized using starting Pt precursor concentrations of 20, 30, 40, and 50 mM after 200 °C treatment.

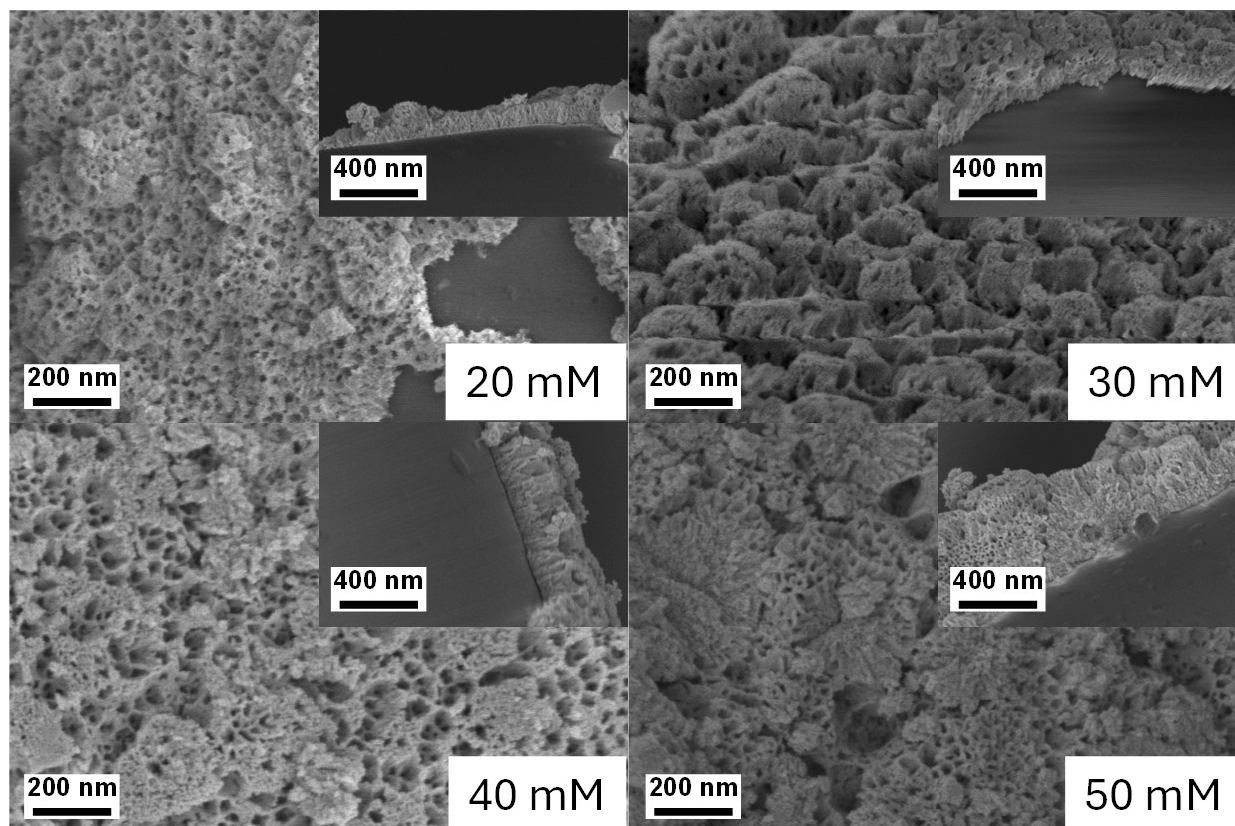

**Fig. S9.** High magnification SEM images of mPt@QF synthesized using starting Pt precursor concentrations of 20, 30, 40, and 50 mM after 200 °C treatment.

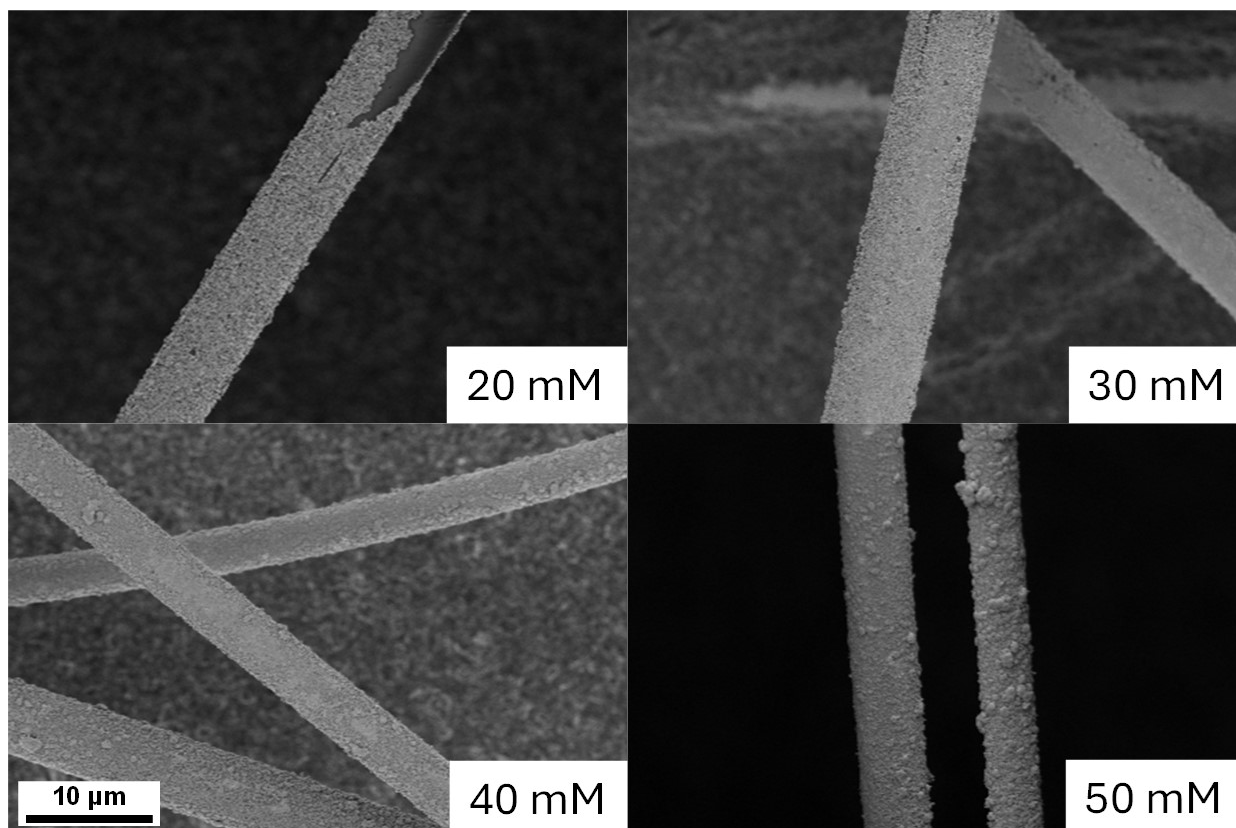

**Fig. S10.** SEM images of mPt@QF synthesized using starting Pt precursor concentrations of 20, 30, 40, and 50 mM after 350 °C treatment.

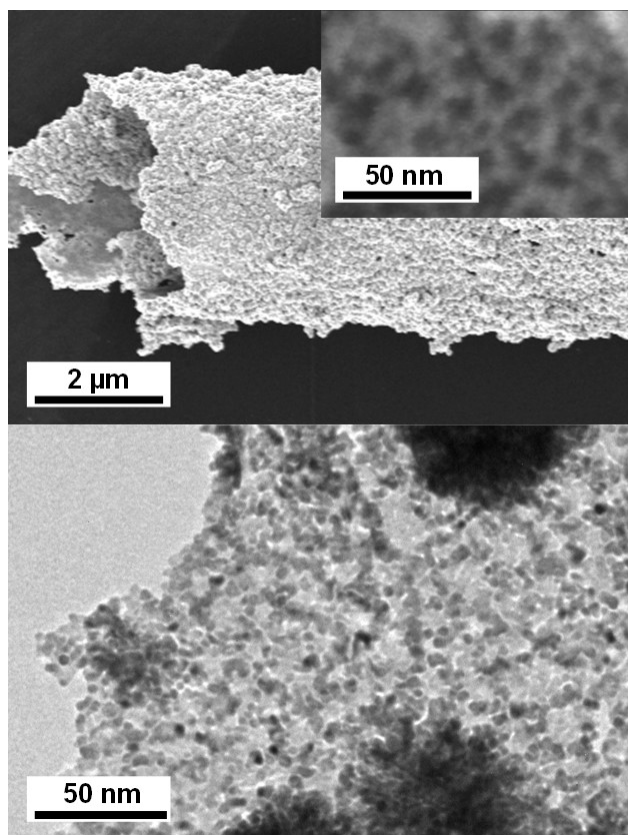

**Fig. S11.** SEM(top) and TEM (bottom) images of bimetallic mPtPd after removal of QF.

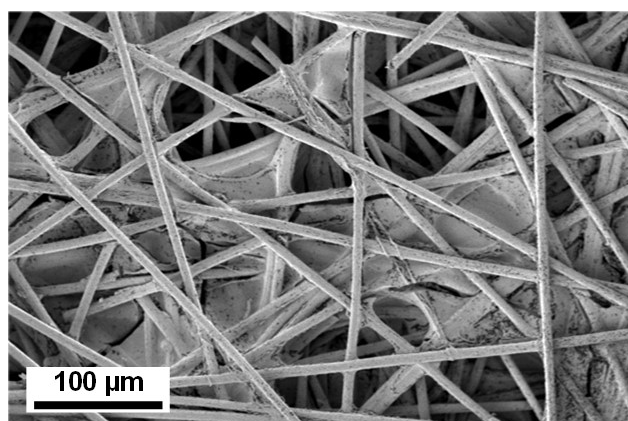

**Fig. S12.** SEM images of mPt@CP synthesized using starting Pt precursor concentrations of 40 mM.

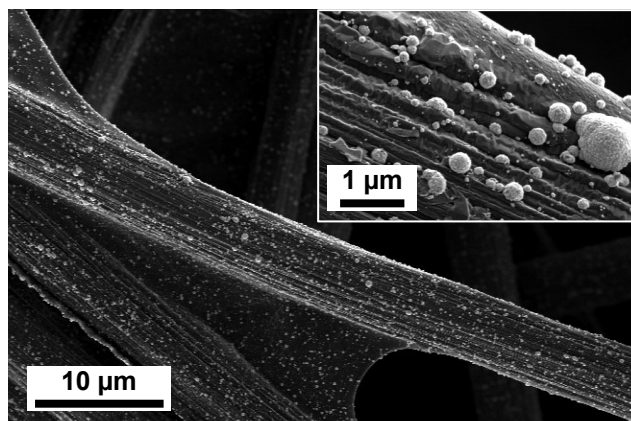

**Fig. S13.** SEM images of mPt@CP synthesized using starting Pt precursor concentrations of 40 mM in the absence of APTES modification. The bright spots are mPt nanoparticles.

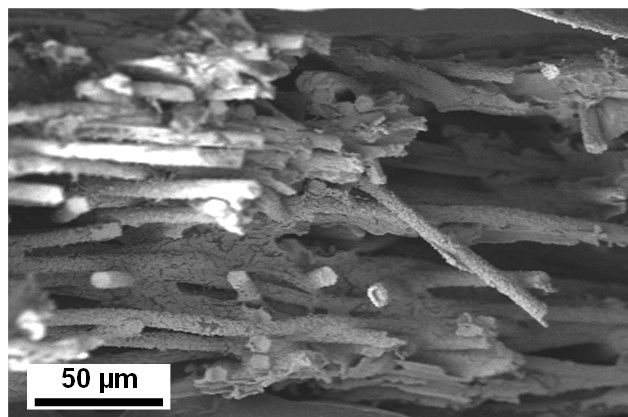

**Fig. S14.** SEM images of cross-section of mPt@CP.

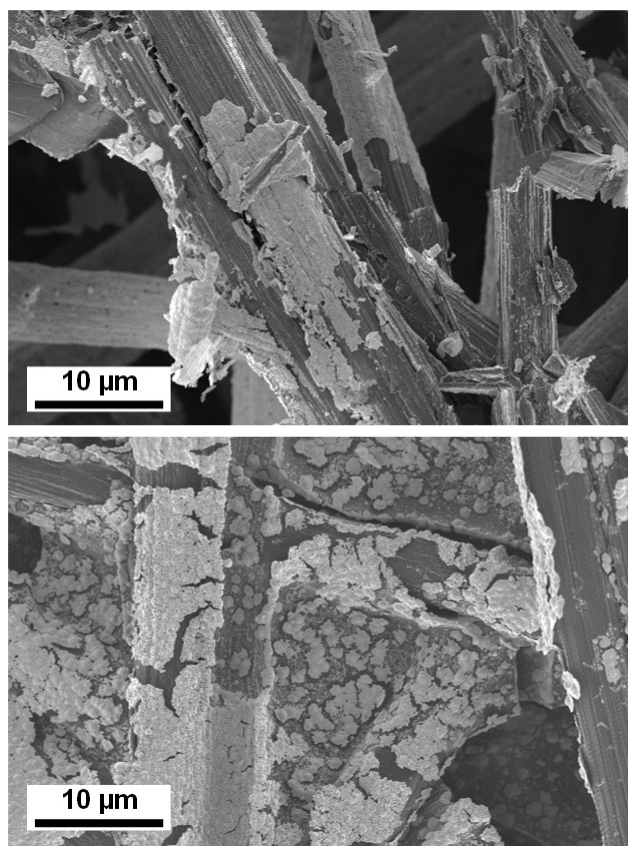

**Fig. S15.** SEM images of mPt@CP after heat treatment in air (top) and N<sub>2</sub> (bottom).
